# Supplementary material for: Green synthesis and antifungal activity of Al2O3NPs against fluconazole-resistant Candida spp isolated from a tertiary care hospital
Source: Royal Society of Chemistry journal article supplement (doi:10.1039/c6ra23365a), 2016-01-01

**Supplementary Table S1.** Elemental composition of Al<sub>2</sub>O<sub>3</sub> NPs

| <b>Element</b> | <b>Weight %</b> | <b>Atom %</b> |
|----------------|-----------------|---------------|
| Al             | 45.35           | 32.98         |
| O              | 54.65           | 67.02         |
| Total          | 100             | 100           |

**Supplementary Figure 1:** Showing zone of inhibition of  $\text{Al}_2\text{O}_3$  NPs against *Candida* at 62, 125, 250, 500 and 1000 concentration (CON; plant extract).

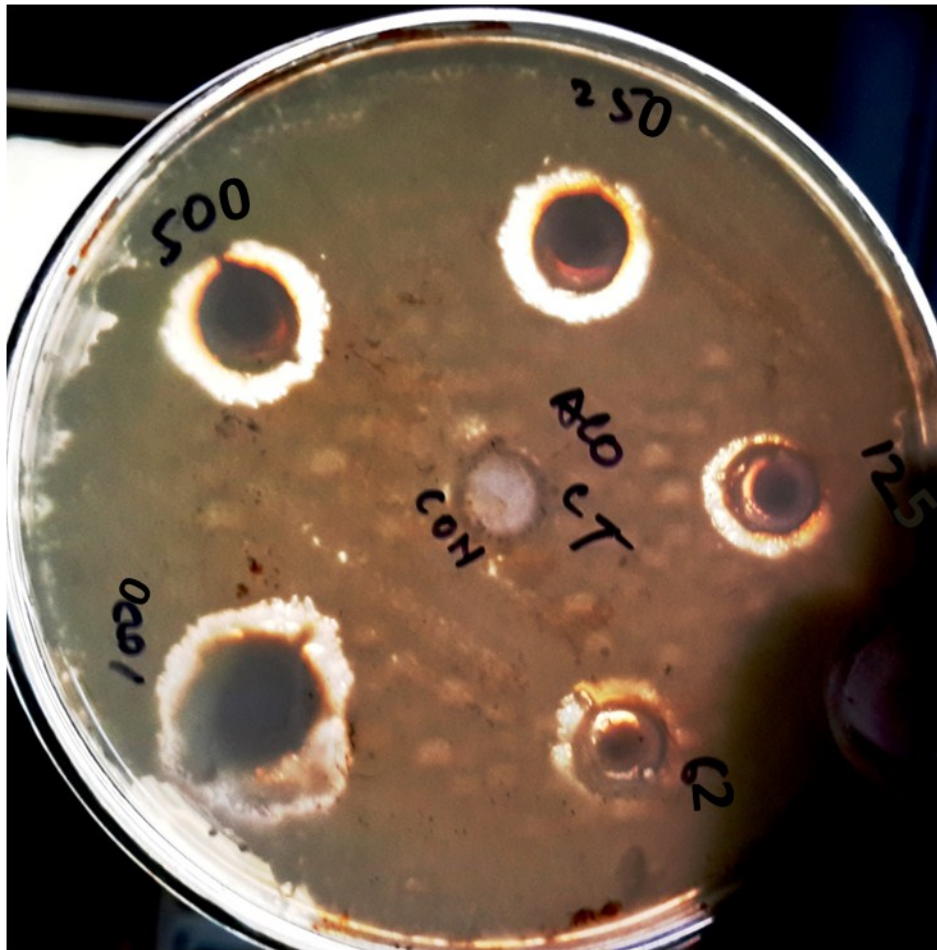

Supplement: c6ra23365a1.pdf [file c6ra23365a1.pdf]
